# Supplementary material for: Structural, Physical, and Mechanical Analysis of ZnO and TiO2 Nanoparticle-Reinforced Self-Adhesive Coating Restorative Material
Source: MDPI journal article supplement (doi:10.3390/ma14247507), 2021-12-07
Supplement: s1 [file s1]

## Supplementary Materials

# Structural, Physical, and Mechanical Analysis of ZnO and TiO<sub>2</sub> Nanoparticle-Reinforced Self-Adhesive Coating Restorative Material

Qura Tul Ain Idrees <sup>1</sup>, Nazish Gul <sup>1</sup>, Muhammad Amber Fareed <sup>2</sup>, Salman Aziz Mian <sup>3</sup>, Danish Muzaffar <sup>4</sup>, Muhammad Nasir <sup>5</sup>, Aqif Anwar Chaudhry <sup>5</sup>, Sultan Akhtar <sup>6</sup>, Syed Zubairuddin Ahmed <sup>7</sup> and Abdul Samad Khan <sup>7,\*</sup>

**Citation:** Idrees, Q.T.A.; Gul, N.; Fareed, M.A.; Mian, S.A.; Muzaffar, D.; Nasir, M.; Chaudhry, A.A.; Akhtar, S.; Ahmed, S.Z.; Khan, A.S. Structural, Physical, and Mechanical Analysis of ZnO and TiO<sub>2</sub> Nanoparticle-Reinforced Self-Adhesive Coating Restorative Material. *Materials* **2021**, *14*, 7507. <https://doi.org/10.3390/ma14247507>

Academic Editors: Alexandra Vinagre, Ramos Joao Carlos and Ana Messias

Received: 24 September 2021

Accepted: 26 November 2021

Published: 7 December 2021

**Publisher's Note:** MDPI stays neutral with regard to jurisdictional claims in published maps and institutional affiliations.

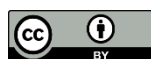

**Copyright:** © 2021 by the authors. Licensee MDPI, Basel, Switzerland. This article is an open access article distributed under the terms and conditions of the Creative Commons Attribution (CC BY) license (<http://creativecommons.org/licenses/by/4.0/>).

<sup>1</sup> Department of Science of Dental Materials, Postgraduate Medical Institute, Lahore 54000, Pakistan; aineshahzad@gmail.com (Q.T.A.I.); gul.nazish029@gmail.com (N.G.)

<sup>2</sup> Adult Restorative Dentistry, Dental Biomaterials and Prosthodontics Oman Dental College, Muscat 116, Oman; mafareed@staff.odc.edu.om

<sup>3</sup> Department of Dental Materials, Institute of Dentistry, CMH Lahore Medical College, Lahore 54000, Pakistan; salman\_aziz@cmhlahore.edu.pk

<sup>4</sup> Faculty of Dentistry, SEGi University, Kota Damansara, Petaling Jaya 47810, Malaysia; danish9181@hotmail.com

<sup>5</sup> Interdisciplinary Research Centre in Biomedical Materials, COMSATS University Islamabad, Lahore Campus, Lahore 54000, Pakistan; muhammadnasir@cuilahore.edu.pk (M.N.); aqifanwar@cuilahore.edu.pk (A.A.C.)

<sup>6</sup> Department of Biophysics, Institute for Research and Medical Consultations, Imam Abdulrahman Bin Faisal University, Dammam 31441, Saudi Arabia; suakhtar@iau.edu.sa

<sup>7</sup> Department of Restorative Dental Sciences, College of Dentistry, Imam Abdulrahman Bin Faisal University, Dammam 31441, Saudi Arabia; szahmed@iau.edu.sa

\* Correspondence: akhan@iau.edu.sa; Tel.: +966-59-478-1075

## Morphological analysis

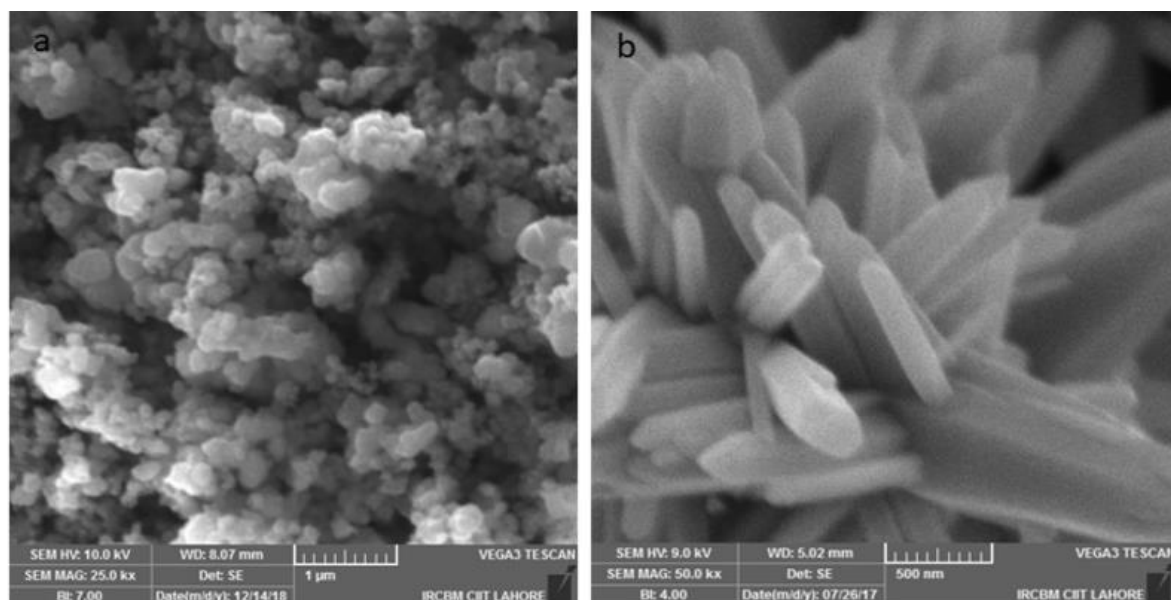

**Figure S1.** SEM images of (a) titanium dioxide and (b) zinc oxide nanoparticles, where the particle size of titanium dioxide and zinc oxide are 50-100 nm and 200-500 nm, respectively.

## Thermal analysis

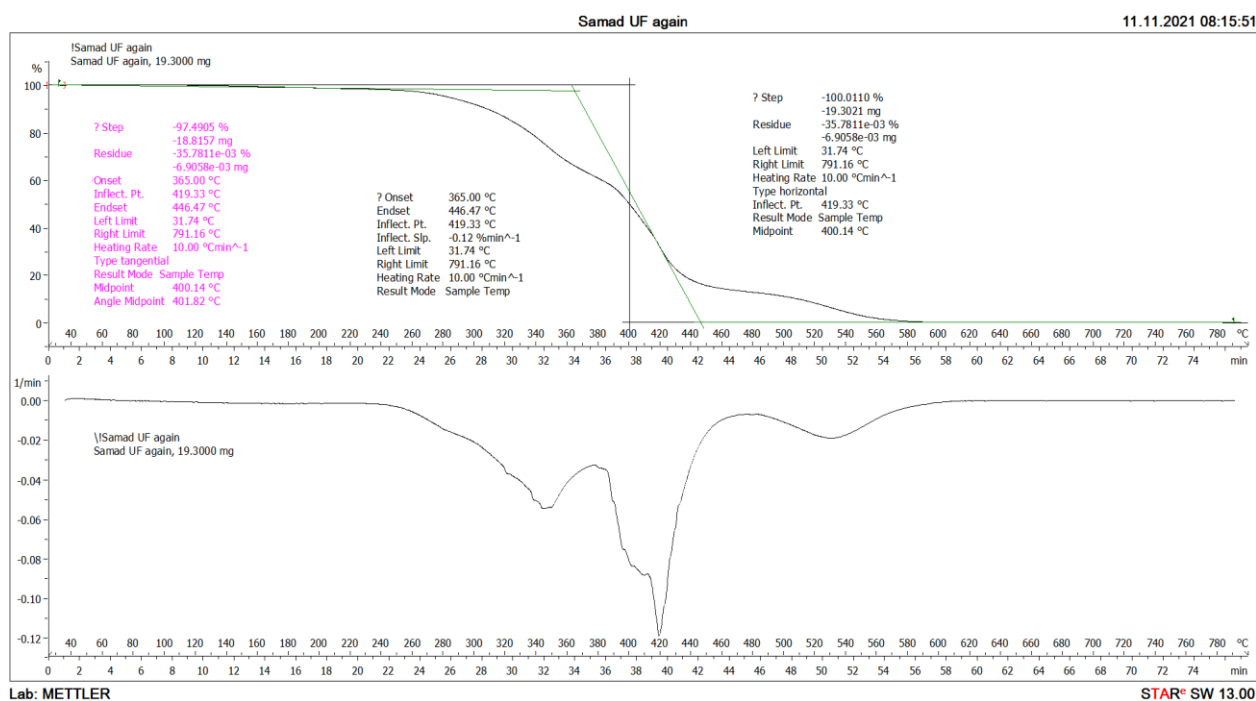

(a)

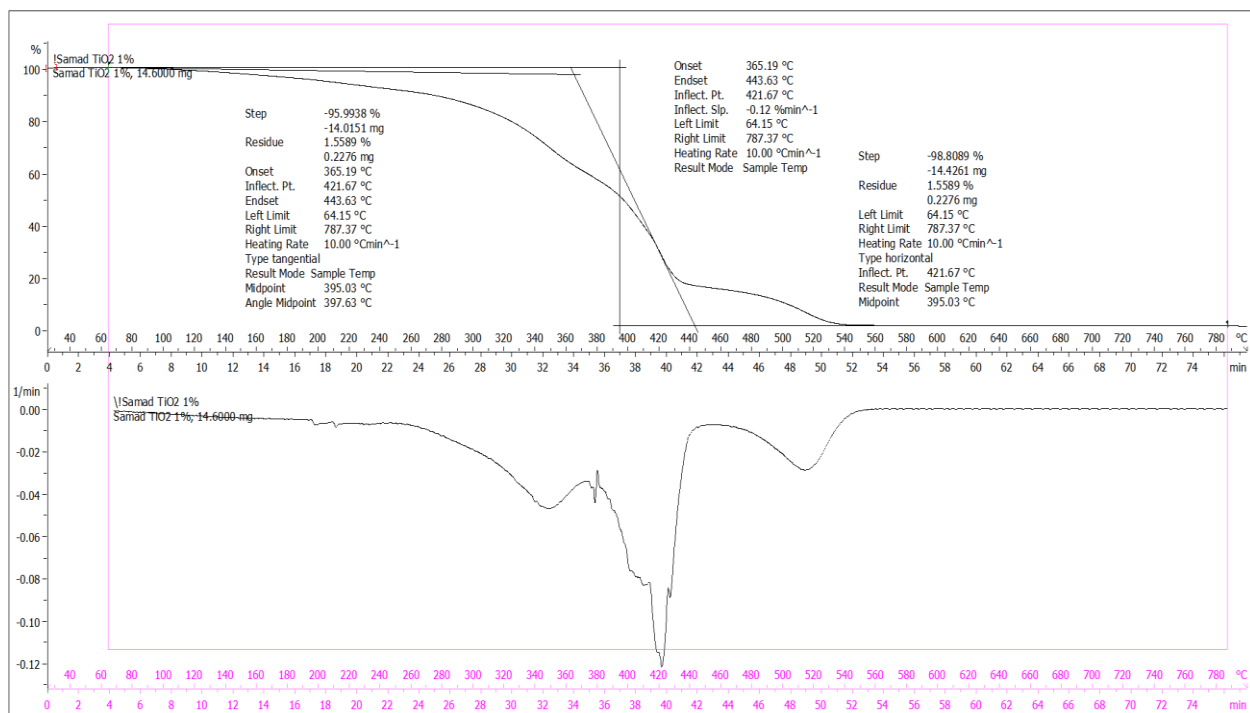

Lab: METTLER

STAR® SW 13.00

(b)

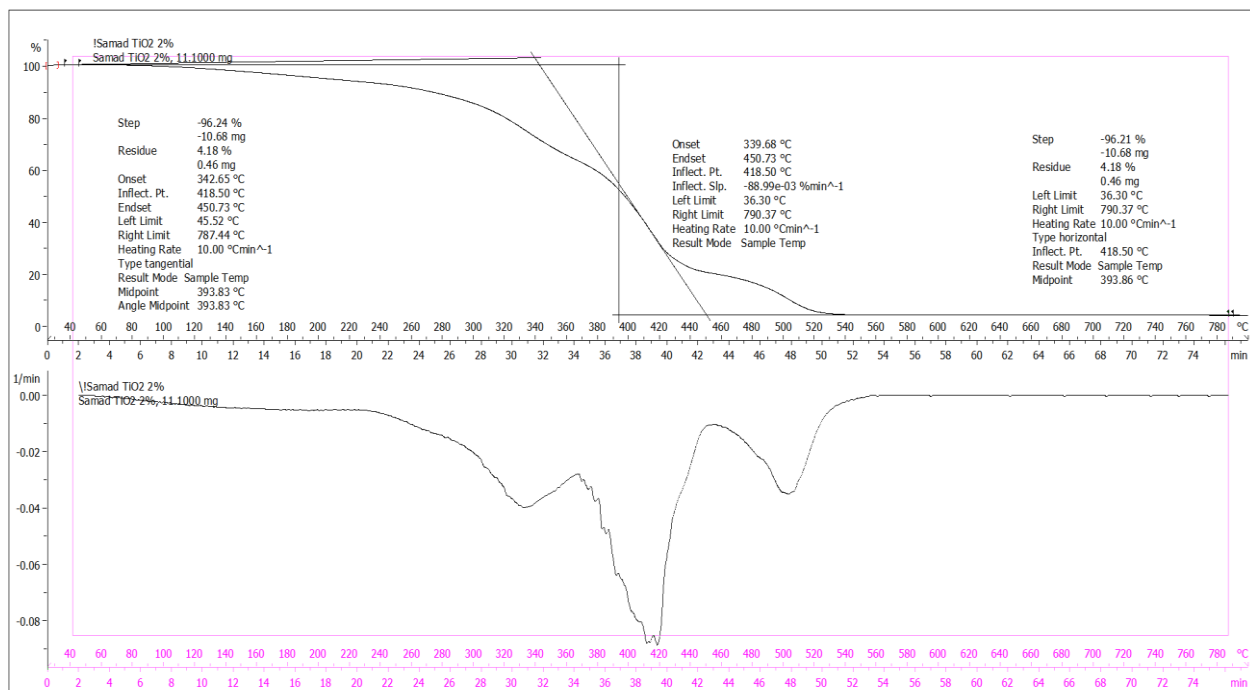

Lab: METTLER

STAR® SW 13.00

(c)

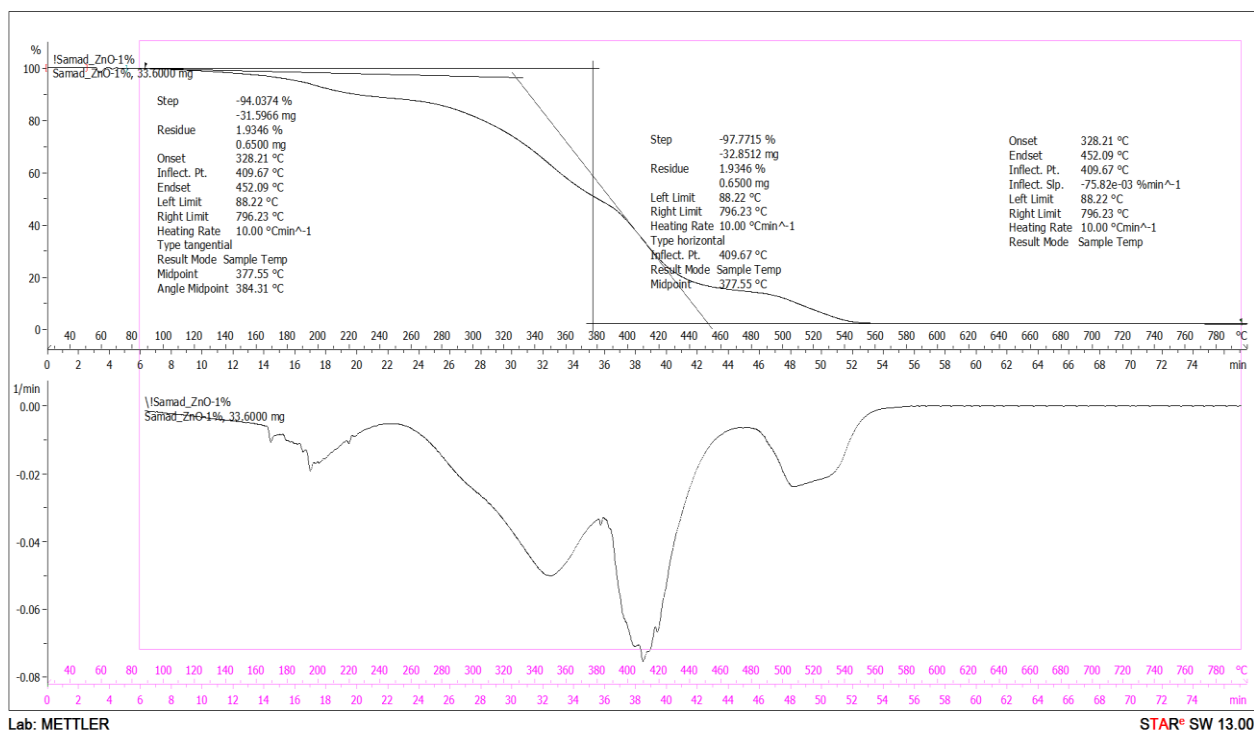

(d)

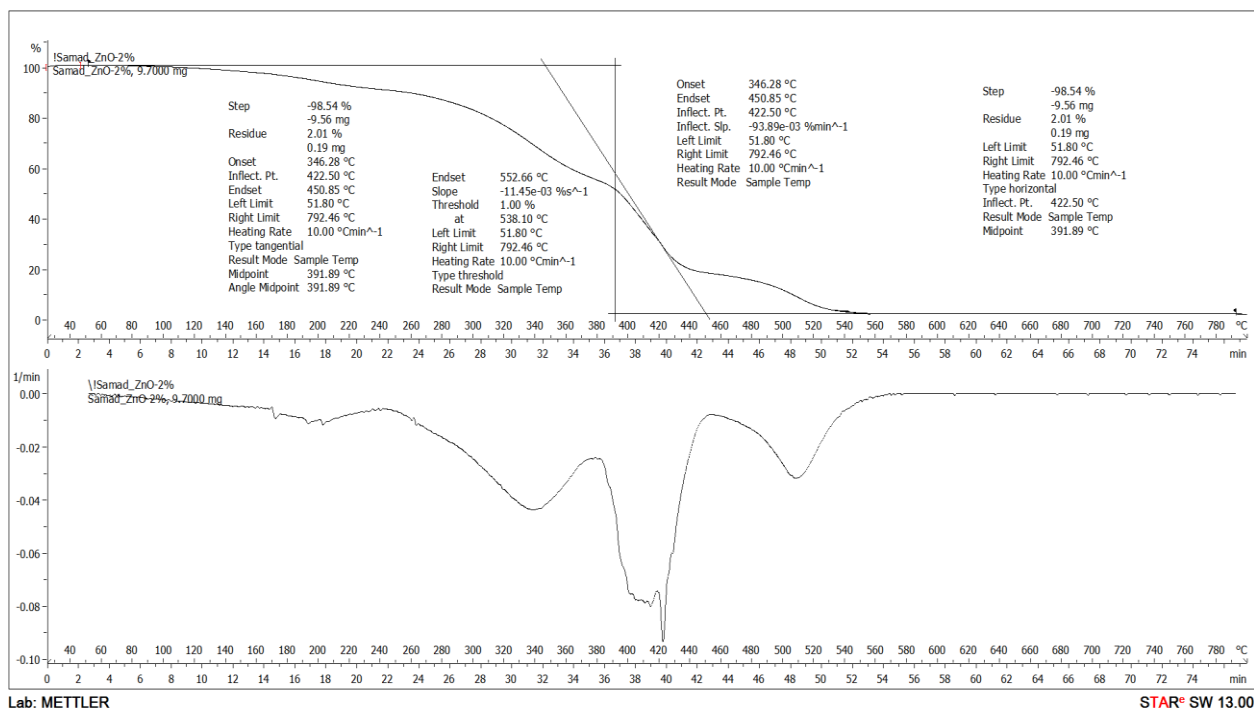

(e)

**Figure S2.** (a) Thermogram of EC-C showing weight loss (%) and derivative weight loss. (b) Thermogram of EC-T1 showing weight loss (%) and derivative weight loss. (c) Thermogram of EC-T2 showing weight loss (%) and derivative weight loss. (d) Thermogram of EC-Z1 showing weight loss (%) and derivative weight loss. (e) Thermogram of EC-Z2 showing weight loss (%) and derivative weight loss.
